# Supplementary material
Source: PubMed Central journal article supplement (PMC8044032)
Supplement: NIHMS1684082-supplement-SI-pdf-file.pdf [file NIHMS1684082-supplement-SI-pdf-file.pdf]

## Supporting Information

### Implementing and assessing an alchemical method for calculating protein-protein binding free energy

*Dharmeshkumar Patel\*†, Jagdish Suresh Patel†‡, F. Marty*

*Ytreberg\*†§*

†Institute for Modeling Collaboration and Innovation, University  
of Idaho, Moscow, ID-83844, USA

‡Department of Biological Sciences, University of Idaho, Moscow,  
ID-83844, USA

§Department of Physics, University of Idaho, Moscow, ID-83844,  
USA

\*corresponding authors

#### **SI Contents**

1. Tables of  $\Delta\Delta G$  values of single mutations of 1BRS and 3HFM systems in SKEMPI database
2. Prediction of  $\Delta\Delta G$  values of test mutations of 1BRS system as a function of transition time.
3. Prediction of  $\Delta\Delta G$  values of test mutations of 3HFM system as a function of transition time.

1. Tables of  $\Delta\Delta G$  values of single mutations of 1BRS and 3HFM systems in SKEMPI database

| <b>Systems</b>            | <b>Mutations</b>                 | <b>Experimental <math>\Delta\Delta G</math> (kcal/mol)</b> | <b>Average <math>\Delta\Delta G</math> (kcal/mol)</b> |
|---------------------------|----------------------------------|------------------------------------------------------------|-------------------------------------------------------|
| <b>1BRS</b>               | <b>D54A<sup>1</sup></b>          | <b>-0.17</b>                                               | <b>-0.53</b>                                          |
|                           |                                  | <b>-0.89</b>                                               |                                                       |
|                           | <b>W44F<sup>2</sup></b>          | <b><math>0.06 \pm 0.2</math></b>                           |                                                       |
|                           | <b>W38F<sup>2</sup></b>          | <b><math>1.64 \pm 0.2</math></b>                           |                                                       |
|                           | <b>R59K<sup>3</sup></b>          | <b>2.49</b>                                                |                                                       |
|                           | <b>E73S<sup>4</sup></b>          | <b><math>3.01 \pm 0.2</math></b>                           |                                                       |
|                           | <b>H102D<sup>3</sup></b>         | <b>4.55</b>                                                |                                                       |
|                           | <b>R83Q<sup>2</sup></b>          | <b><math>5.42 \pm 0.2</math></b>                           |                                                       |
|                           | <b>D39A<sup>1,2,5</sup></b>      | <b>5.94</b>                                                | <b>6.79</b>                                           |
|                           |                                  | <b><math>7.65 \pm 0.2</math></b>                           |                                                       |
|                           |                                  | <b>5.41</b>                                                |                                                       |
|                           |                                  | <b>4.59</b>                                                |                                                       |
|                           | <b>D35A<sup>2</sup></b>          | <b><math>4.5 \pm 0.2</math></b>                            | <b>4.29</b>                                           |
|                           |                                  | <b>4.07</b>                                                |                                                       |
|                           | <b>E60A<sup>1</sup></b>          | <b>0.51</b>                                                | <b>0.09</b>                                           |
|                           |                                  | <b>-0.33</b>                                               |                                                       |
|                           | <b>E73A<sup>1,4</sup></b>        | <b><math>2.35 \pm 0.2</math></b>                           | <b>2.35</b>                                           |
|                           |                                  | <b>1.90</b>                                                |                                                       |
|                           |                                  | <b>2.81</b>                                                |                                                       |
|                           | <b>E73C<sup>4</sup></b>          | <b><math>2.53 \pm 0.2</math></b>                           |                                                       |
|                           | <b>E73F<sup>4</sup></b>          | <b><math>2.24 \pm 0.2</math></b>                           |                                                       |
|                           | <b>E73Q<sup>4</sup></b>          | <b><math>1.45 \pm 0.2</math></b>                           |                                                       |
|                           | <b>E73W<sup>4</sup></b>          | <b><math>1.66 \pm 0.2</math></b>                           |                                                       |
|                           | <b>E73Y<sup>4</sup></b>          | <b><math>2.41 \pm 0.2</math></b>                           |                                                       |
|                           | <b>E76A<sup>2,5</sup></b>        | <b><math>1.36 \pm 0.2</math></b>                           | <b>1.09</b>                                           |
|                           |                                  | <b>0.82</b>                                                |                                                       |
| <b>E80A<sup>2,5</sup></b> | <b><math>0.54 \pm 0.2</math></b> | <b>0.48</b>                                                |                                                       |
|                           | <b>0.41</b>                      |                                                            |                                                       |

|                     |                              |                    |              |
|---------------------|------------------------------|--------------------|--------------|
|                     | H102A <sup>1-3</sup>         | 6.15 ± 0.2         | 6.35         |
|                     |                              | 6.91               |              |
|                     |                              | 6.25               |              |
|                     |                              | 6.08               |              |
|                     | H102G <sup>3</sup>           | 6.82               |              |
|                     | H102L <sup>3</sup>           | 7.67               |              |
|                     | H102Q <sup>3</sup>           | 4.55               |              |
|                     | K27A <sup>1,2</sup>          | 5.38 ± 0.2         | 5.13         |
|                     |                              | 5.41               |              |
|                     |                              | 4.59               |              |
|                     | N58A <sup>1</sup>            | 3.07               | 3.09         |
|                     |                              | 3.12               |              |
|                     | R59A <sup>1-3</sup>          | 5.25 ± 0.2         | 4.99         |
|                     |                              | 4.64               |              |
|                     |                              | 5.18               |              |
| 4.89                |                              |                    |              |
| R87A <sup>1,2</sup> | 5.56 ± 0.2                   | 5.76               |              |
|                     | 5.95                         |                    |              |
| T42A <sup>2</sup>   | 1.86 ± 0.2                   |                    |              |
| W35F <sup>1</sup>   | 1.41                         | 1.26               |              |
|                     | 1.11                         |                    |              |
| Y29A <sup>2</sup>   | 3.47 ± 0.2                   |                    |              |
| Y29F <sup>2</sup>   | -0.13                        |                    |              |
| <b>3HFM</b>         | <b>Y20F<sup>6,7</sup></b>    | <b>-0.5 ± 0.06</b> | <b>-0.48</b> |
|                     |                              | <b>-0.46 ± 0.1</b> |              |
|                     | <b>D32N<sup>8</sup></b>      | <b>0.17 ± 0.3</b>  |              |
|                     | <b>R21A<sup>6-8</sup></b>    | <b>1.03 ± 0.09</b> | <b>0.90</b>  |
|                     |                              | <b>0.82 ± 0.08</b> |              |
|                     |                              | <b>0.86 ± 0.09</b> |              |
|                     | <b>D101K<sup>6,9</sup></b>   | <b>1.97 ± 0.21</b> | <b>2.13</b>  |
|                     |                              | <b>2.28 ± 0.15</b> |              |
|                     | <b>W98F<sup>8</sup></b>      | <b>3.25 ± 0.16</b> |              |
|                     | <b>Y50L<sup>8</sup></b>      | <b>4.4 ± 0.12</b>  |              |
|                     | <b>N31E<sup>8</sup></b>      | <b>5.71 ± 0.13</b> |              |
|                     | <b>K97D<sup>6</sup></b>      | <b>6.77 ± 0.14</b> |              |
|                     | <b>D101A<sup>6,7,9</sup></b> | 1.21 ± 0.23        | 1.23         |
|                     |                              | 1.53 ± 0.16        |              |
|                     |                              | 0.95 ± 0.2         |              |

|                      |              |      |
|----------------------|--------------|------|
| D101E <sup>6,9</sup> | 1.97 ± 0.21  | 2.13 |
|                      | 2.29 ± 0.14  |      |
| D101F <sup>6,9</sup> | 2.17 ± 0.25  | 2.33 |
|                      | 2.49 ± 0.19  |      |
| D101G <sup>6,9</sup> | 0.2 ± 0.31   | 0.36 |
|                      | 0.52 ± 0.27  |      |
| D101N <sup>6,9</sup> | 1.34 ± 0.26  | 1.49 |
|                      | 1.64 ± 0.21  |      |
| D101Q <sup>6,9</sup> | 1.93 ± 0.22  | 2.09 |
|                      | 2.24 ± 0.15  |      |
| D101R <sup>6,9</sup> | 2.12 ± 0.28  | 2.28 |
|                      | 2.44 ± 0.23  |      |
| D101S <sup>6,9</sup> | 1.71 ± 0.2   | 1.87 |
|                      | 2.03 ± 0.12  |      |
| G102V <sup>6,9</sup> | 0.24 ± 0.21  | 0.40 |
|                      | 0.55 ± 0.14  |      |
| H15A <sup>7</sup>    | -0.45 ± 0.18 |      |
| K96A <sup>8</sup>    | 6.99 ± 0.27  |      |
| K96M <sup>6</sup>    | 6.78 ± 0.12  |      |
| K96R <sup>7</sup>    | 5.36 ± 0.12  |      |
| K97A <sup>6,8</sup>  | 6.17 ± 0.08  | 5.86 |
|                      | 5.56 ± 0.12  |      |
| K97E <sup>6</sup>    | 3.61 ± 0.12  |      |
| K97G <sup>6</sup>    | 6.43 ± 0.1   |      |
| K97M <sup>6,8</sup>  | 1.09 ± 0.08  | 0.95 |
|                      | 0.8 ± 0.12   |      |
| K97R <sup>6</sup>    | 3.05 ± 0.32  |      |
| L75A <sup>7</sup>    | 0.7 ± 0.1    |      |
| N31A <sup>8</sup>    | 5.22 ± 0.15  |      |
| N31D <sup>8</sup>    | 1.34 ± 0.28  |      |
| N31E <sup>8</sup>    | 5.71 ± 0.13  |      |
| N32A <sup>8</sup>    | 5.11 ± 0.22  |      |
| N19D <sup>9</sup>    | 0.41 ± 0.37  |      |
| N19K <sup>9</sup>    | 0.24 ± 0.25  |      |
| N19Q <sup>9</sup>    | -0.04 ± 0.49 |      |
| N93A <sup>7</sup>    | 0.21 ± 0.15  |      |
| Q53A <sup>8</sup>    | 0.95 ± 0.18  |      |
| R21E <sup>6,9</sup>  | 2.29 ± 0.22  | 1.15 |
|                      | 2.62 ± 0.16  |      |

|                      |             |      |
|----------------------|-------------|------|
| R21G <sup>6,9</sup>  | 2.27 ± 0.3  | 2.42 |
|                      | 2.58 ± 0.26 |      |
| R21H <sup>6,9</sup>  | 2.02 ± 0.31 | 2.17 |
|                      | 2.33 ± 0.26 |      |
| R21K <sup>6,9</sup>  | 1.62 ± 0.26 | 1.77 |
|                      | 1.91 ± 0.2  |      |
| R21M <sup>6</sup>    | 2.05 ± 0.07 |      |
| R21N <sup>6,9</sup>  | 2.17 ± 0.2  | 2.33 |
|                      | 2.49 ± 0.11 |      |
| R21Q <sup>6,9</sup>  | 2.24 ± 0.23 | 2.40 |
|                      | 2.56 ± 0.16 |      |
| R21W <sup>6,9</sup>  | 1.97 ± 0.28 | 2.13 |
|                      | 2.29 ± 0.23 |      |
| R73A <sup>7</sup>    | -0.33 ± 0.2 |      |
| S31A <sup>8</sup>    | 0.17 ± 0.34 |      |
| S100A <sup>7</sup>   | 0.27 ± 0.2  |      |
| W98A <sup>8</sup>    | 5.51 ± 0.17 |      |
| W63A <sup>7</sup>    | 0.32 ± 0.26 |      |
| Y33A <sup>8</sup>    | 6.04 ± 0.15 |      |
| Y33F <sup>10</sup>   | 1.05        |      |
| Y33L <sup>10</sup>   | 1.97        |      |
| Y33W <sup>10</sup>   | 1.72        |      |
| Y50A <sup>8</sup>    | 7.32 ± 0.39 |      |
| Y50F <sup>8</sup>    | 1.58        | 1.97 |
|                      | 2.36 ± 0.18 |      |
| Y50L <sup>10</sup>   | 2.80        |      |
| Y53A <sup>10</sup>   | 3.20        |      |
| Y53F <sup>10</sup>   | 0.61        |      |
| Y53L <sup>10</sup>   | 0.79        |      |
| Y53W <sup>10</sup>   | 0.69        |      |
| Y58A <sup>10</sup>   | 1.65        |      |
| Y58F <sup>10</sup>   | 0.36        |      |
| Y58L <sup>10</sup>   | 1.49        |      |
| Y96A <sup>10</sup>   | 2.71 ± 0.07 |      |
| Y96F <sup>10</sup>   | 1.4 ± 0.18  |      |
| Y20A <sup>7,10</sup> | 4.88 ± 0.11 | 4.58 |
|                      | 4.27 ± 0.2  |      |
| Y20L <sup>7</sup>    | 2.19 ± 0.14 |      |

**Table S1. Experimental  $\Delta\Delta G$  values and associated experimental errors reported for single mutations for the 1BRS and 3HFM systems in the SKEMPI database.** Bold font denotes the eight mutations selected for each system. The average  $\Delta\Delta G$  value was used in this study when multiple  $\Delta\Delta G$  values for a single mutation were in the database.

**2. Prediction of  $\Delta\Delta G$  values of test mutations of 1BRS system as a function of transition time**

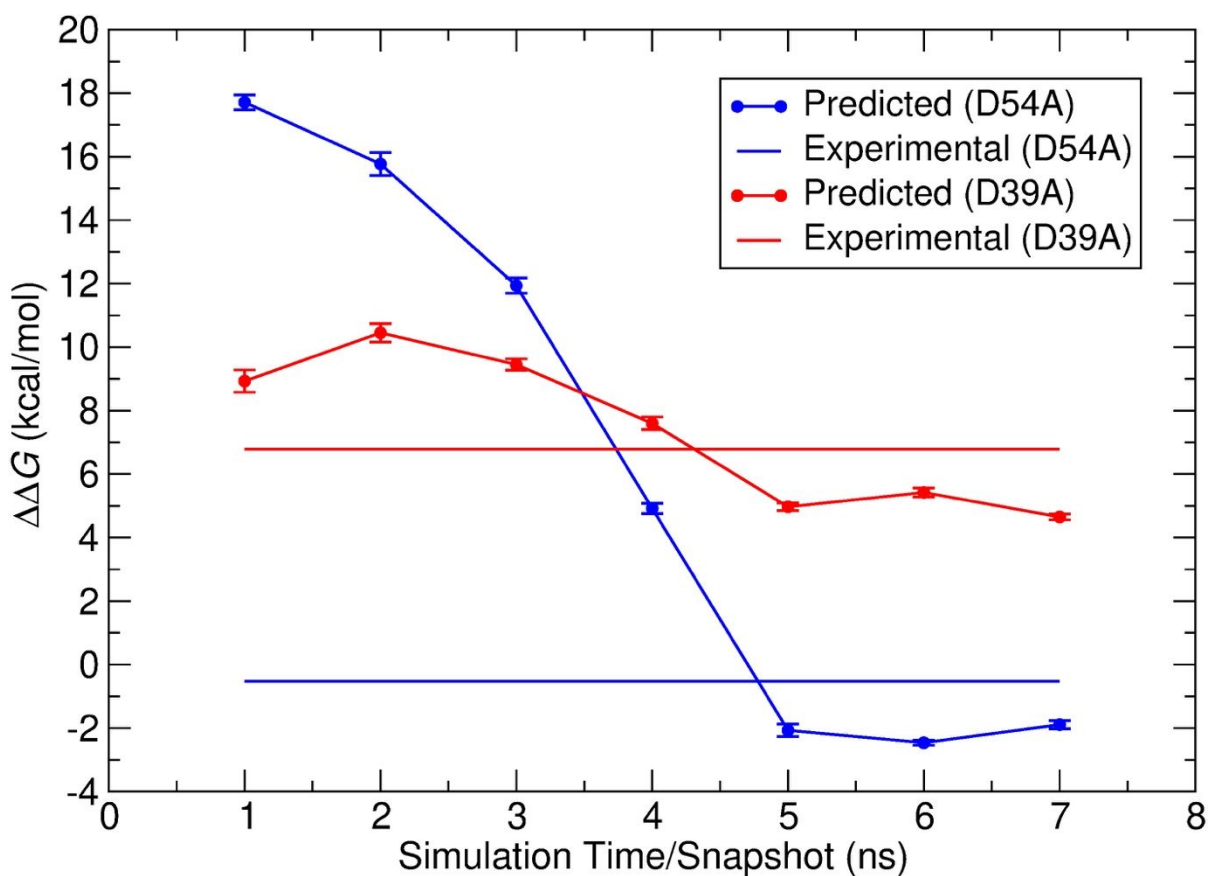

**Figure S1. Predicted  $\Delta\Delta G$  values of D54A (blue) and D39A (red) mutations as a function of transition time averaged over 100 independent transitions.**  $\Delta\Delta G$  values of two test mutations D54A and D39A from the 1BRS system estimated for different transition time ranging from 1 ns to 7 ns. The data points show the mean  $\Delta\Delta G$  estimates and error bars show the standard deviations from the 100 trials. The predicted  $\Delta\Delta G$  values for D54A and D39A can be compared to experiment (horizontal lines).

**3. Prediction of  $\Delta\Delta G$  values of test mutations of 3HFM system as a function of transition time**

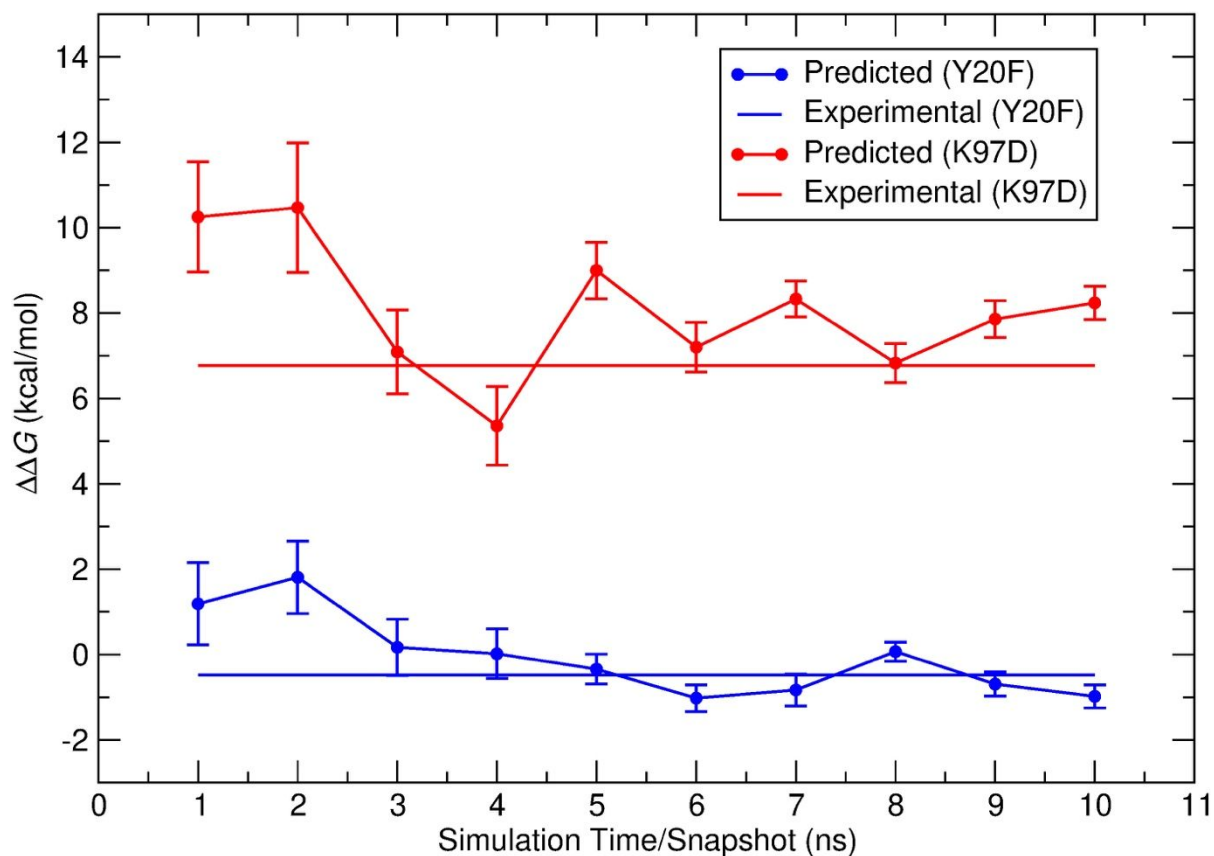

**Figure S2. Predicted  $\Delta\Delta G$  values of Y20F (blue) and K97D (red) mutations as a function of transition time averaged over 100 independent transitions.  $\Delta\Delta G$  values of two test mutations Y20F and K97D from the 3HFM system estimated for different transition time ranging from 1 ns to 10 ns. The data points show the mean  $\Delta\Delta G$  estimates and error bars show the standard deviations from the 100 trials. The predicted  $\Delta\Delta G$  values for Y20F and K97D can be compared to experiment (horizontal lines).**

## REFERENCES



- (1) Schreiber, G.; Fersht, A. R. Interaction of Barnase with Its Polypeptide Inhibitor Barstar Studied by Protein Engineering. *Biochemistry* **1993**, *32* (19), 5145-5150. <https://doi.org/10.1021/bi00070a025>.
- (2) Schreiber, G.; Fersht, A. R. Energetics of Protein-Protein Interactions: Analysis Ofthe Barnase-Barstar Interface by Single Mutations and Double Mutant Cycles. *Journal of Molecular Biology* **1995**, *248* (2), 478-486. [https://doi.org/10.1016/S0022-2836\(95\)80064-6](https://doi.org/10.1016/S0022-2836(95)80064-6).
- (3) Hartley, R. W. Directed Mutagenesis and Barnase-Barstar Recognition. *Biochemistry* **1993**, *32* (23), 5978-5984. <https://doi.org/10.1021/bi00074a008>.
- (4) Frisch, C.; Schreiber, G.; Johnson, C. M.; Fersht, A. R. Thermodynamics of the Interaction of Barnase and Barstar: Changes in Free Energy versus Changes in Enthalpy on Mutation. *J Mol Biol* **1997**, *267* (3), 696-706. <https://doi.org/10.1006/jmbi.1997.0892>.
- (5) Ikura, T.; Urakubo, Y.; Ito, N. Water-Mediated Interaction at a Protein-Protein Interface. *Chemical Physics* **2004**, *307* (2), 111-119. <https://doi.org/10.1016/j.chemphys.2004.05.010>.
- (6) Taylor, M. G.; Rajpal, A.; Kirsch, J. F. Kinetic Epitope Mapping of the Chicken Lysozyme.HyHEL-10 Fab Complex: Delineation of Docking Trajectories. *Protein Sci* **1998**, *7* (9), 1857-1867.
- (7) Rajpal, A.; Taylor, M. G.; Kirsch, J. F. Quantitative Evaluation of the Chicken Lysozyme Epitope in the HyHEL-10 Fab Complex: Free Energies and Kinetics. *Protein Sci* **1998**, *7* (9), 1868-1874. <https://doi.org/10.1002/pro.5560070903>.
- (8) Pons, J.; Rajpal, A.; Kirsch, J. F. Energetic Analysis of an Antigen/Antibody Interface: Alanine Scanning Mutagenesis and Double Mutant Cycles on the HyHEL-10/Lysozyme Interaction. *Protein Sci* **1999**, *8* (5), 958-968. <https://doi.org/10.1110/ps.8.5.958>.
- (9) Kam-Morgan, L. N.; Smith-Gill, S. J.; Taylor, M. G.; Zhang, L.; Wilson, A. C.; Kirsch, J. F. High-Resolution Mapping of the HyHEL-10 Epitope of Chicken Lysozyme by Site-Directed Mutagenesis. *Proc Natl Acad Sci U S A* **1993**, *90* (9), 3958-3962.
- (10) Tsumoto, K.; Ogasahara, K.; Ueda, Y.; Watanabe, K.; Yutani, K.; Kumagai, I. Role of Tyr Residues in the Contact Region of Anti-Lysozyme Monoclonal Antibody HyHEL10 for Antigen Binding. *J Biol Chem* **1995**, *270* (31), 18551-18557. <https://doi.org/10.1074/jbc.270.31.18551>.
